# Supplementary material for: Charge-Modulated Synthesis of Highly Stable Iron Oxide Nanoparticles for In Vitro and In Vivo Toxicity Evaluation
Source: MDPI journal article supplement (doi:10.3390/nano11113068), 2021-11-14
Supplement: s1 [file s1]

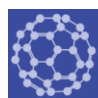

## Supplementary Materials

# Charge-Modulated Synthesis of Highly Stable Iron Oxide Nanoparticles for In Vitro and In Vivo Toxicity Evaluation

Sunyoung Woo <sup>1</sup>, Soojin Kim <sup>2,3</sup>, Hyunhong Kim <sup>1</sup>, Young Woo Cheon <sup>4</sup>, Seokjoo Yoon <sup>2,5,\*</sup>, Jung-Hwa Oh <sup>2,5,\*</sup> and Jongnam Park <sup>1,6,\*</sup>

<sup>1</sup> School of Energy and Chemical Engineering, Ulsan National Institute of Science and Technology (UNIST), Ulsan 44919, Korea; sywoo1225@unist.ac.kr (S.W.); khh2008@unist.ac.kr (H.K.)

<sup>2</sup> Department of Predictive Toxicology, Korea Institute of Toxicology (KIT), Daejeon 34114, Korea; sjkim@kitox.re.kr

<sup>3</sup> Department of Bio and Brain Engineering, Korea Advanced Institute of Science and Technology (KAIST), Daejeon 34141, Korea

<sup>4</sup> Department of Plastic and Reconstructive Surgery, Gachon University Gil Medical Center, Incheon 21565, Korea; youngwooc@gilhospital.com

<sup>5</sup> Department of Human and Environmental Toxicology, University of Science and Technology (UST), Daejeon 34113, Korea

<sup>6</sup> Department of Biomedical Engineering, Ulsan National Institute of Science and Technology (UNIST), Ulsan 44919, Korea

\* Correspondence: sjyoon@kitox.re.kr (S.Y.); jhoh@kitox.re.kr (J.-H.O.); jnpark@unist.ac.kr (J.P.)

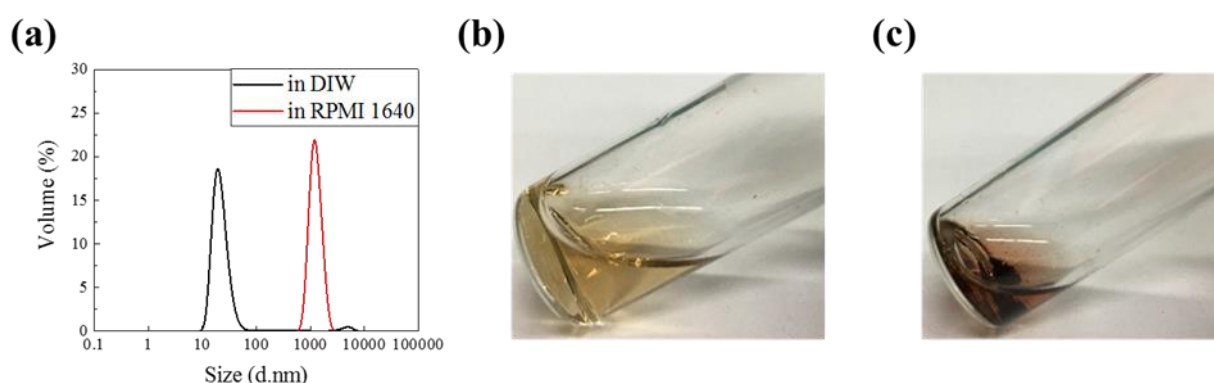

**Figure S1.** Stability test of IONPs coated with ligands having 80% positively functional groups in DIW and RPMI 1640 media. (a) H.D. of the IONPs dispersed in water and RPMI 1640 medium. Camera image of the IONPs (b) well-dispersed in water and (c) agglomerated in RPMI 1640 medium.

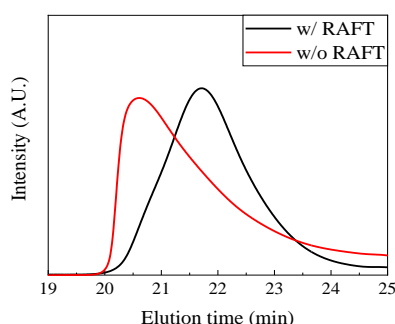

**Figure S2.** GPC of (n) ligand in THF showing narrow PDI with a [Monomer]: [RAFT] ratio of 20:1 and [AIBN]: [RAFT] ratio of 1:1 (black line), along with poor PDI without a RAFT agent (red line).

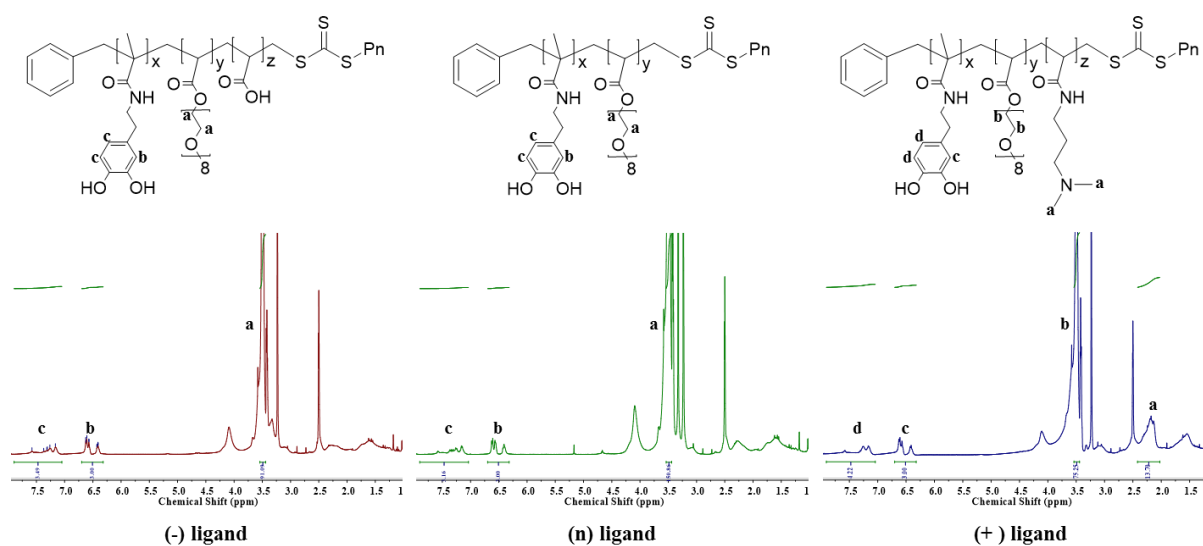

**Figure S3.**  $^1\text{H}$ -NMR spectra of the three polymeric ligands measured in  $\text{DMSO-d}_6$ .

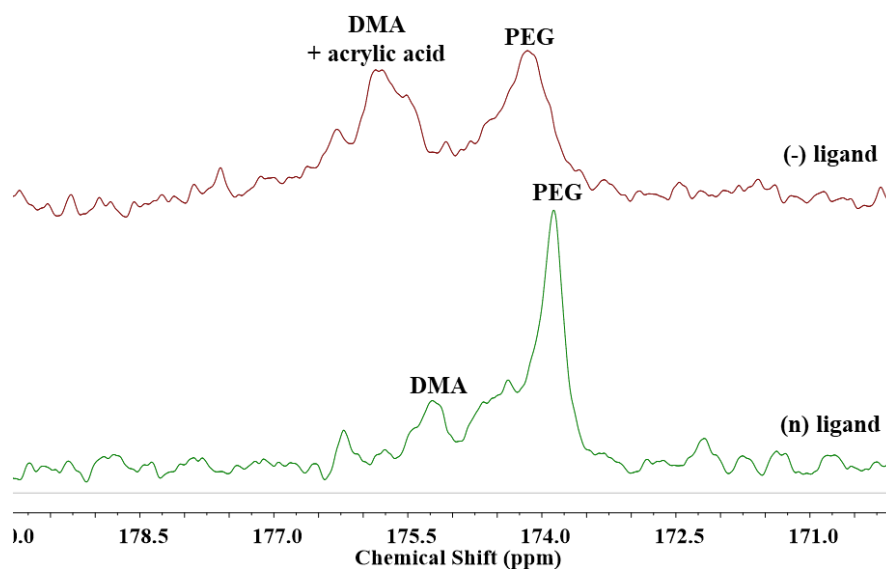

**Figure S4.** IG  $^{13}\text{C}$  NMR spectra of (-) ligand and (n) ligand measured in  $\text{DMSO-d}_6$ . The composition of DMA + PEG and functional group in the (-) ligand were 48% and 52%, respectively, by IG  $^{13}\text{C}$  NMR and those of DMA and PEG in the (-) ligand were 25% and 75%, respectively, by  $^1\text{H}$  NMR. Based on these data, we finally calculated the proportion of DMA, PEG, and the functional group of (n) ligand to be 17%, 52%, and 31%, respectively. The compositions of DMA and PEG in the (n) ligand were 18% and 82%, respectively, by IG  $^{13}\text{C}$  NMR and it corresponded with the  $^1\text{H}$  NMR data. These results support the validity of the (-) ligand data.

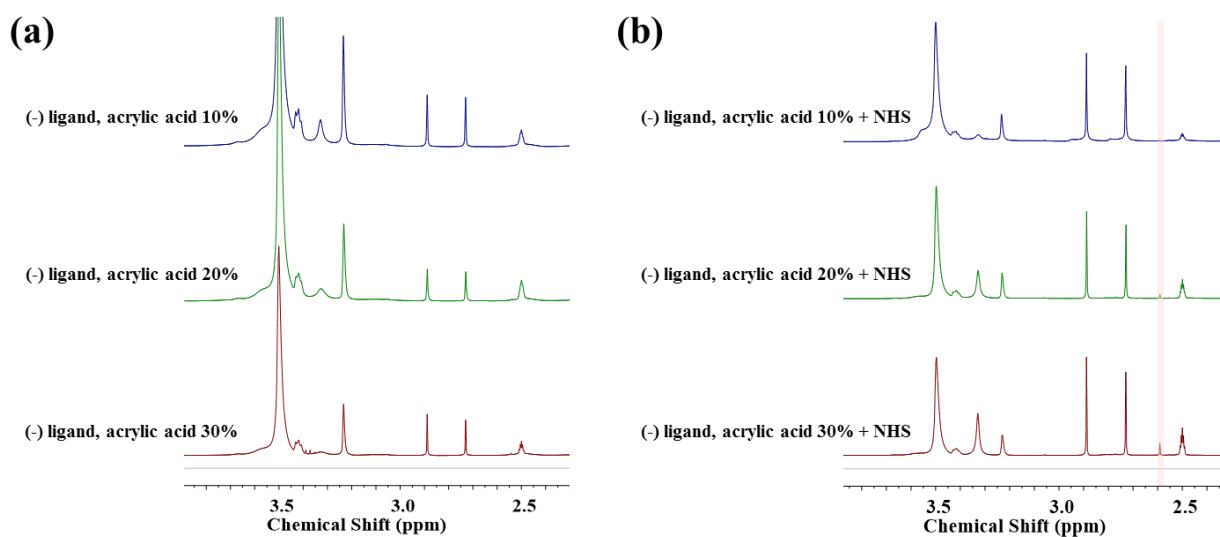

**Figure S5.**  $^1\text{H}$ -NMR spectra of (-) ligand (a) with different ratios of acrylic acid and (b) after conjugation with NHS measured in DMSO- $d_6$ .

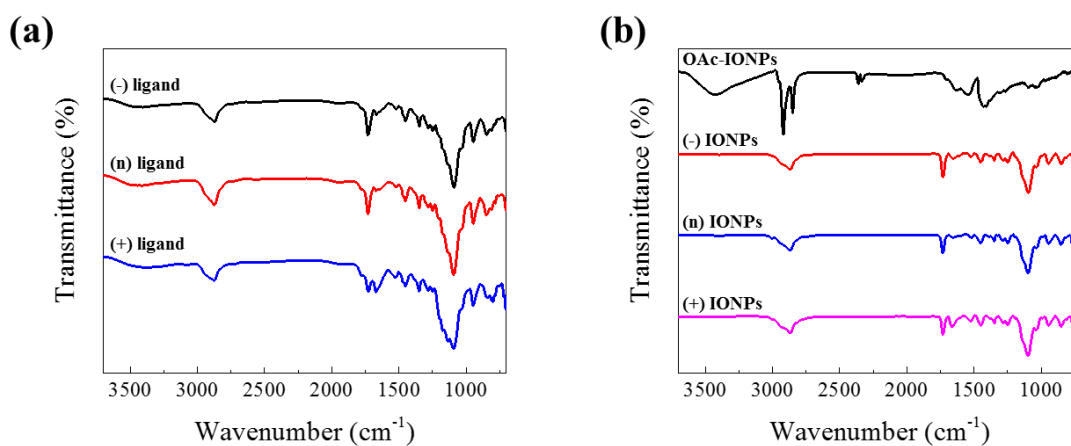

**Figure S6.** FT-IR spectra of (a) the three charged OAc-IONPs and (b) three charged IONPs after the ligand exchange of OAc-IONPs.

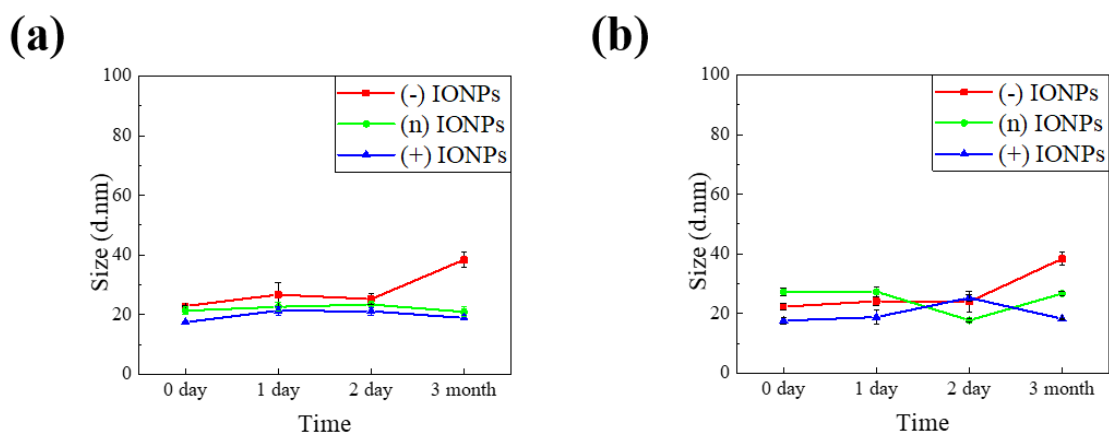

**Figure S7.** Colloidal stability of three charged IONPs in cell culture media. H.D. of three charged IONPs (a) in RPMI1640 media and (b) in DMEM media until 3 month.

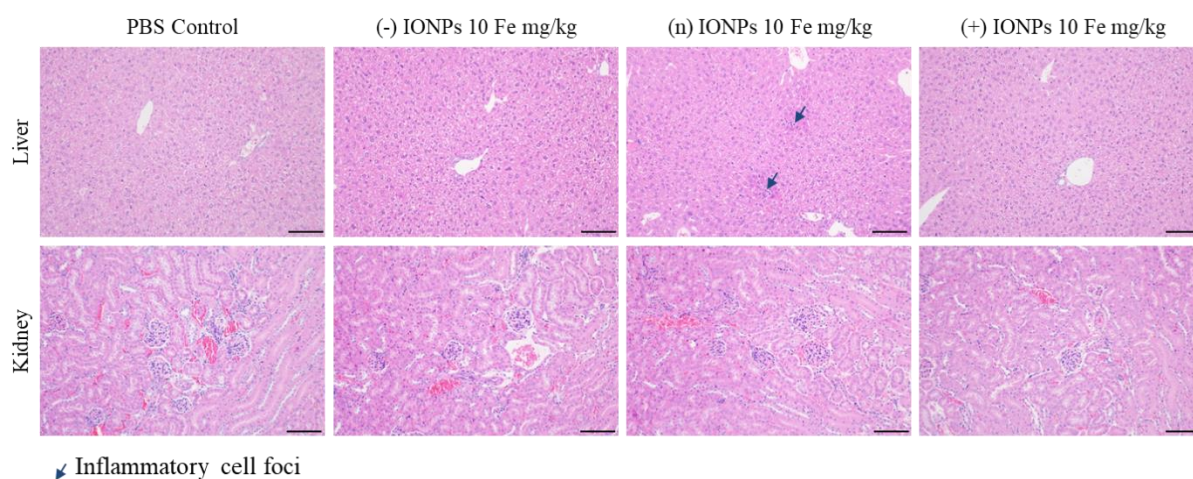

**Figure S8.** Histological image of liver and kidney in mice for three differently charged IONPs. Magnification = X200, Scale bar = 100  $\mu$ m.
